# Supplementary material for: Pathological Lying: Theoretical and Empirical Support for a Diagnostic Entity
Source: Atypon-hosted journal article supplement (doi:10.1176/appi.prcp.20190046), 2020-06-22
Supplement: rcp21013-sup-0001-suppl-data.pdf [file rcp21013-sup-0001-suppl-data.pdf]

Appendix A

Survey of pathological lying behaviors (SOPL)

1 (*strongly disagree*) to 7 (*strongly agree*) for items 1-7

1. My lying behaviors have resulted in impairment for me in:
  - a. My occupation
  - b. Social relationships
  - c. Finances
  - d. Legal contexts
2. My lying causes me significant distress.
3. My lying has put myself or others in danger.
4. My lying is something out of my control.
5. After I lie I feel less anxious.
6. My lies tend to grow larger from an initial lie.
7. Most of the lies I tell are for no reason.
8. What is the earliest stage that you or others considered yourself to be a pathological liar?  
Childhood (3-10 years)  
Adolescence (10-20 years)  
Early adulthood (20-40 years)  
Middle Adulthood (40-60 years)  
Late adulthood (65 years or more)
9. How long have you been telling numerous lies/engaged in pathological lying?  
3 months  
6 months  
1 year  
1-5 years  
More than 5 years
